# Supplementary material for: Adverse Events of Extracorporeal Ultrasound-Guided High Intensity Focused Ultrasound Therapy
Source: PubMed Central journal article supplement (PMC3237413; doi:10.1371/journal.pone.0026110), 2011-12-14
Supplement: pone.0026110.s001.pdf [file pone.0026110.s001.pdf]

Table S1 Summary of AEs related to the use of the device FEB-BY

| Disease          | Case | Adverse event                                                                                                                                                                                                    | Incidence           |
|------------------|------|------------------------------------------------------------------------------------------------------------------------------------------------------------------------------------------------------------------|---------------------|
| <i>Malignant</i> |      |                                                                                                                                                                                                                  |                     |
| Liver            | 889  | Skin burn 71<br>Rib injury 5<br>Palpitation 4<br>ALT/AST elevation 15<br>Jaundice aggravation 2<br>Gastroenteric dysfunction 7<br>Severe abdomen pain 39<br>Bleeding/liquefaction 7<br>Intrahepatic metastasis 7 | 17.66%<br>(157/889) |
| Pancreas         | 1411 | Burn 27<br>Jaundice aggravation 8<br>Diabetes 22<br>Pancreatitis 26<br>Steatorrhea 13<br>Gastroenteric dysfunction 9<br>Collapse 3<br>Bleeding 2<br>Hepatic abscess 1                                            | 7.87%<br>(111/1411) |
| Bone             | 13   | Skin burn 1                                                                                                                                                                                                      | 7.69%<br>(1/13)     |
| Soft tissues     | 35   | Burn 4                                                                                                                                                                                                           | 11.43%<br>(4/35)    |
| Prostate         | 249  | Skin burn 24<br>Hematuria 26<br>Urinary obstruction 9<br>Urethral stricture 2<br>Incontinence 2                                                                                                                  | 25.30%<br>(63/249)  |
| Kidney           | 7    |                                                                                                                                                                                                                  |                     |
| Adrenal          | 18   | Skin burn 2<br>Rib injury 5<br>Palpitation 2                                                                                                                                                                     | 50.00%<br>(9/18)    |
| Bladder          | 223  | Hematuria 47<br>Urinary irritation 14<br>Spasm 1                                                                                                                                                                 | 27.80%<br>(62/223)  |
| Digestive tract  | 81   | Skin burn 2                                                                                                                                                                                                      | 2.47%<br>(2/81)     |
| Metastatic nodes | 28   | Skin burn 27                                                                                                                                                                                                     | 96.43%<br>(27/28)   |

|                               |      |                              |                     |
|-------------------------------|------|------------------------------|---------------------|
| Retroperitoneal metastasis    | 130  | Skin burn 4                  | 3.08%<br>(4/130)    |
| Celiac metastatic lesions     | 122  | Skin burn 4                  | 18.03%<br>(22/122)  |
|                               |      | Severe pain 6                |                     |
|                               |      | Gastroenteric dysfunction 12 |                     |
| Unspecified                   | 747  | Skin burn 20                 | 9.64%<br>(72/747)   |
|                               |      | Nerve injury 6               |                     |
|                               |      | Hematuria 21                 |                     |
|                               |      | Intestinal obstruction 7     |                     |
|                               |      | Gastroenteric dysfunction 6  |                     |
|                               |      | Bleeding 6                   |                     |
|                               |      | Faint 5                      |                     |
|                               |      | Dysuria 1                    |                     |
|                               | 3953 | 534                          | 13.51%              |
| <i>Benign</i>                 |      |                              |                     |
| Uterine fibroid/adenomyoma    | 2154 | Skin burn 56                 | 6.78%<br>(146/2154) |
|                               |      | Nerve injury 59              |                     |
|                               |      | Severe abdomen pain 2        |                     |
|                               |      | Hematuria 22                 |                     |
|                               |      | Urinary irritation 1         |                     |
|                               |      | Gastroenteric dysfunction 6  |                     |
| Prostate hyperplasia          | 678  | Hematuria 122                | 26.40%<br>(179/678) |
|                               |      | Urinary irritation 33        |                     |
|                               |      | Urine retention 24           |                     |
| Secondary hyperparathyroidism | 2    | Skin burn 1                  | 50%<br>(1/2)        |
| Hypersplenism                 | 3    |                              |                     |
| Chyluria                      | 20   |                              |                     |
| Ectopic pregnancy             | 16   |                              |                     |
| Dermoid cyst                  | 1    |                              |                     |
|                               | 2874 | 326                          | 11.34%              |
| Total                         | 6827 | 860                          | 12.60%              |
