# Supplementary material for: Adverse Events of Extracorporeal Ultrasound-Guided High Intensity Focused Ultrasound Therapy
Source: PubMed Central journal article supplement (PMC3237413; doi:10.1371/journal.pone.0026110), 2011-12-14
Supplement: pone.0026110.s002.pdf [file pone.0026110.s002.pdf]

Table S2 Summary of AEs related to the use of the device JC

| Disease          | Case | Adverse event                                 | Incidence            |
|------------------|------|-----------------------------------------------|----------------------|
| <i>Malignant</i> |      |                                               |                      |
| Liver            | 1156 | Skin burn 420                                 | 53.29%<br>(616/1156) |
|                  |      | Chest wall injury 2                           |                      |
|                  |      | Vertebra injury 4                             |                      |
|                  |      | Supraventricular tachycardia 8                |                      |
|                  |      | Hydropericardium 2                            |                      |
|                  |      | Hypertension 8                                |                      |
|                  |      | Cholecystitis 5                               |                      |
|                  |      | Intrahepatic cholangiectasis 5                |                      |
|                  |      | ALT/AST elevation 66                          |                      |
|                  |      | Gastroenteric dysfunction 15                  |                      |
|                  |      | Tumor rupture 2                               |                      |
|                  |      | Rupture of esophageal varices 1               |                      |
|                  |      | Lung embolism 2                               |                      |
|                  |      | Hydrothorax 57                                |                      |
|                  |      | Pneumonodema 1                                |                      |
|                  |      | Asthma 2                                      |                      |
|                  |      | Hematuria 8                                   |                      |
|                  |      | Creatine elevation 2                          |                      |
|                  |      | Renal failure 1                               |                      |
|                  |      | High fever 4                                  |                      |
| Death 1          |      |                                               |                      |
| Pancreas         | 129  | Skin burn 16                                  | 23.26%<br>(30/129)   |
|                  |      | Vertebra burn 2                               |                      |
|                  |      | Amylase elevation 6                           |                      |
|                  |      | Jaundice aggravation 1                        |                      |
|                  |      | Gastrointestinal dysfunction 4                |                      |
| Bone             | 204  | Occlusion of the superior mesenteric artery 1 | 21.57%<br>(44/204)   |
|                  |      | Skin burn 9                                   |                      |
|                  |      | Nerve injury 14                               |                      |
|                  |      | Fracture 10                                   |                      |
|                  |      | ALP elevation 5                               |                      |
|                  |      | Tumor rupture 1                               |                      |
|                  |      | Infection 2                                   |                      |
|                  |      | Epiphyseal separation 1                       |                      |
|                  |      | Hemoglobinuria 1                              |                      |
|                  |      | Death 1                                       |                      |
| Breast           | 99   | Skin burn 15                                  | 15.15%<br>(15/99)    |

|                                          |      |                                                                                                                                                                                                                        |                    |
|------------------------------------------|------|------------------------------------------------------------------------------------------------------------------------------------------------------------------------------------------------------------------------|--------------------|
| Soft tissues                             | 45   | Skin burn 1<br>Cutaneous necrosis 4<br>Nerve injury 3                                                                                                                                                                  | 17.78%<br>(8/45)   |
| Kidney                                   | 4    |                                                                                                                                                                                                                        |                    |
| Chest/abdomen wall<br>metastasis         | 41   | Skin burn 16<br>Skin numb 3<br>Bowel perforation 1<br>Dyspnea 1                                                                                                                                                        | 51.22%<br>(21/41)  |
| Intraperitoneal<br>recurrence/metastasis | 15   | Skin burn 15<br>Skin numb 5<br>Occlusion of the superior mesenteric artery 1<br>Bowel perforation 1<br>Gastrointestinal dysfunction 13<br>Hypertension 2<br>ALT/AST elevation 2<br>Creatine elevation 1<br>Hematuria 2 | 280%<br>(42/15)    |
| Seminal vesicle                          | 1    | Skin burn 1                                                                                                                                                                                                            | 100%<br>(1/1)      |
| Unspecified                              | 84   | Skin burn 7<br>Hydrothorax 3<br>Bowel perforation 2                                                                                                                                                                    | 14.29%<br>(12/84)  |
|                                          | 1778 | 789                                                                                                                                                                                                                    | 44.38%             |
| <i>Benign</i>                            |      |                                                                                                                                                                                                                        |                    |
| Uterine fibroid/<br>adenomyoma           | 389  | Skin burn 27<br>Vertebra burn 23<br>Nerve injury 21<br>Severe abdomen pain 15<br>Hematuria 3                                                                                                                           | 22.88%<br>(89/389) |
| Breast fibroadenoma                      | 128  |                                                                                                                                                                                                                        |                    |
| Fibroma                                  | 1    | Limb necrosis 1<br>Hemoglobinuria 1                                                                                                                                                                                    | 200%<br>(2/1)      |
|                                          | 518  | 91                                                                                                                                                                                                                     | 17.57%             |
| Total                                    | 2296 | 880                                                                                                                                                                                                                    | 38.33%             |
