# Supplementary material for: Adverse Events of Extracorporeal Ultrasound-Guided High Intensity Focused Ultrasound Therapy
Source: PubMed Central journal article supplement (PMC3237413; doi:10.1371/journal.pone.0026110), 2011-12-14
Supplement: pone.0026110.s003.pdf [file pone.0026110.s003.pdf]

Table S3 Summary of AEs related to the use of the device NIT-9000

| Disease                    | Case | Adverse event                                                                             | Incidence            |
|----------------------------|------|-------------------------------------------------------------------------------------------|----------------------|
| <i>Malignant</i>           |      |                                                                                           |                      |
| Liver                      | 33   | Skin burn 2<br>Rib injury 2                                                               | 12.12%<br>(4/33)     |
| Pancreas                   | 147  | Skin burn 8<br>Jaundice aggravation 1                                                     | 6.12%<br>(9/147)     |
| Breast                     | 68   | Skin burn 4                                                                               | 5.88%<br>(4/68)      |
| Retroperitoneal metastasis | 89   | Burn 3                                                                                    | 3.37%<br>(3/89)      |
| Unspecified                | 184  | Burn 13<br>Nerve injury 28<br>Hematuria 1                                                 | 22.83%<br>(42/184)   |
|                            | 521  | 62                                                                                        | 11.90%               |
| <i>Benign</i>              |      |                                                                                           |                      |
| Uterine fibroid/adenomyoma | 2190 | Skin burn 12<br>Nerve injury 75<br>Severe abdomen pain 66<br>Hematuria 129<br>Hemafecia 1 | 12.92%<br>(283/2190) |
| Prostate hyperplasia       | 146  | Hematuria 28<br>Urinary irritation 5                                                      | 22.60%<br>(33/146)   |
| Endometriosis              | 8    |                                                                                           |                      |
| Ectopic pregnancy          | 31   |                                                                                           |                      |
|                            | 2375 | 316                                                                                       | 13.31%               |
| Total                      | 2896 | 378                                                                                       | 13.05%               |
