# Supplementary material for: Adverse Events of Extracorporeal Ultrasound-Guided High Intensity Focused Ultrasound Therapy
Source: PubMed Central journal article supplement (PMC3237413; doi:10.1371/journal.pone.0026110), 2011-12-14
Supplement: pone.0026110.s004.pdf [file pone.0026110.s004.pdf]

Table S4 Summary of AEs related to the use of the device 2001

| Disease                    | Case | Adverse event                                       | Incidence         |
|----------------------------|------|-----------------------------------------------------|-------------------|
| <i>Malignant</i>           |      |                                                     |                   |
| Liver                      | 123  |                                                     |                   |
| Pancreas                   | 30   |                                                     |                   |
| Soft tissues               | 1    |                                                     |                   |
| Prostate                   | 92   | Skin burn 3<br>Hematuria 28<br>Urethral stricture 2 | 35.87%<br>(33/92) |
| Kidney                     | 8    |                                                     |                   |
| Bladder                    | 14   |                                                     |                   |
| Uterine cervix             | 6    |                                                     |                   |
| Bile duct                  | 3    |                                                     |                   |
| Digestive tract            | 32   |                                                     |                   |
| Intraperitoneal metastasis | 3    |                                                     |                   |
|                            | 312  | 33                                                  | 10.58%            |
| <i>Benign</i>              |      |                                                     |                   |
| Uterine fibroid            | 404  | Skin burn 10<br>Nerve injury 14<br>Hematuria 5      | 7.18%<br>(29/404) |
| Prostate hyperplasia       | 59   | Hematuria 7                                         | 11.86%<br>(7/59)  |
|                            | 463  | 36                                                  | 7.78%             |
| Total                      | 775  | 69                                                  | 8.90%             |
