# Supplementary material for: Adverse Events of Extracorporeal Ultrasound-Guided High Intensity Focused Ultrasound Therapy
Source: PubMed Central journal article supplement (PMC3237413; doi:10.1371/journal.pone.0026110), 2011-12-14
Supplement: pone.0026110.s005.pdf [file pone.0026110.s005.pdf]

Table S5 Summary of AEs related to the use of the device CZ-901

| Disease          | Case | Adverse event                             | Incidence         |
|------------------|------|-------------------------------------------|-------------------|
| <i>Malignant</i> |      |                                           |                   |
| Bone             | 7    | Tumor rupture 1                           | 14.29%<br>(1/7)   |
|                  | 7    | 1                                         | 14.29             |
| <i>Benign</i>    |      |                                           |                   |
| Uterine fibroid  | 328  | Burn 3<br>Severe/prolonged abdomen pain 9 | 3.66%<br>(12/328) |
| Bone             | 8    |                                           |                   |
|                  | 336  | 12                                        | 3.57%             |
| Total            | 343  | 13                                        | 3.79%             |
