# Supplementary material for: Adverse Events of Extracorporeal Ultrasound-Guided High Intensity Focused Ultrasound Therapy
Source: PubMed Central journal article supplement (PMC3237413; doi:10.1371/journal.pone.0026110), 2011-12-14
Supplement: pone.0026110.s006.pdf [file pone.0026110.s006.pdf]

Table S6 Summary of AEs related to the use of the device 2000

| Disease            | Case | Adverse event | Incidence         |
|--------------------|------|---------------|-------------------|
| <i>Malignant</i>   |      |               |                   |
| Prostate           | 34   | Hematuria 11  | 32.35%            |
|                    | 34   | 11            | (11/34)<br>32.35% |
| <i>Benign</i>      |      |               |                   |
| Uterine adenomyoma | 30   |               |                   |
| Hypersplenism      | 30   | Skin burn 1   | 3.33%             |
|                    | 60   | 1             | (1/30)<br>1.67%   |
| Total              | 94   | 12            | 12.77%            |
