# Supplementary material for: Adverse Events of Extracorporeal Ultrasound-Guided High Intensity Focused Ultrasound Therapy
Source: PubMed Central journal article supplement (PMC3237413; doi:10.1371/journal.pone.0026110), 2011-12-14
Supplement: pone.0026110.s007.pdf [file pone.0026110.s007.pdf]

Table S7 Summary of AEs related to the use of the device HY2900

| Disease                    | Case | Adverse event | Incidence        |
|----------------------------|------|---------------|------------------|
| Uterine fibroid/adenomyoma | 31   | Burn 4        | 12.90%<br>(4/31) |
| Total                      | 31   | 4             | 12.90%           |
